# Supplementary material for: Shark Tooth Weapons from the 19th Century Reflect Shifting Baselines in Central Pacific Predator Assemblies
Source: PLoS One. 2013 Apr 3;8(4):e59855. doi: 10.1371/journal.pone.0059855 (PMC3616018; doi:10.1371/journal.pone.0059855)
Supplement: Table S1 — A list of Shark Tooth Weapons in the FMNH collections used in this study. (XLSX) [file pone.0059855.s001.xlsx]

## Sheet: S1
Catalogue Number	Primary Species	Secondary Species
FMNH112135	Carcharhinus albimarginatus
FMNH211658	C. falciformis
FMNH211659	C. sorrah
FMNH211660	Galeocerdo cuvier
FMNH211661	C. falcformies
FMNH274779	C. sorrah	C. albimarginatus
FMNH274780	C. albimarginatus
FMNH274781	C. albimarginatus
FMNH274782	C. falciformis
FMNH274787	C. albimarginatus
FMNH274788	C. obscurus
FMNH274792	C. falciformis
FMNH274793	C. falciformis
FMNH274794	G. cuvier
FMNH274798	G. cuvier
FMNH274799	G. cuvier
FMNH274800	G. cuvier
FMNH274801	G. cuvier
FMNH274802	C. falciformis	Sphyrna zygaena
FMNH274825	C. obscurus
FMNH274826	C. obscurus
FMNH274827	G. cuvier
FMNH274828	C. albimarginatus
FMNH274831	C. longimanus	C. albimarginatus
FMNH274834	C. albimarginatus
FMNH274835	C. obscurus
FMNH274836	C. obscurus
FMNH274837	C. falciformis	G. cuvier
FMNH274838	C. obscurus
FMNH274839	C. falciformis
FMNH274856	C. albimarginatus	G. cuvier
FMNH274858	C. albimarginatus
FMNH274861	C. albimarginatus
FMNH274863	G. cuvier
FMNH274864	C. falciformis
FMNH275837	C. longimanus
FMNH277751	C. obscurus
FMNH277789	C. falciformis
FMNH38117	G. cuvier
FMNH38138.1	G. cuvier
FMNH38138.2	G. cuvier
FMNH38255	G. cuvier
FMNH38571	C. longimanus
FMNH38603	C. obscurus
FMNH39680	C. albimarginatus
FMNH39681	C. obscurus
FMNH39682	C. obscurus
FMNH39683	C. falciformis
FMNH64509	C. albimarginatus
FMNH64749	C. longimanus
FMNH64750	G. cuvier
FMNH64751	G. cuvier
FMNH64752	G. cuvier
FMNH64753	G. cuvier
FMNH64754	G. cuvier
FMNH65407	C. obscurus
FMNH91438	C. sorrah
FMNH91439	C. obscurus	C. albimarginatus
FMNH92204	C. albimarginatus
FMNH92205	C. albimarginatus
FMNH970773	G. cuvier	C. obscurus
FMNH98989	G. cuvier
FMNH99012	G. cuvier
FMNH99013	G. cuvier
FMNH99014	C. obscurus
FMNH99015	C. albimarginatus
FMNH99016	C. albimarginatus
FMNH99018	G. cuvier
FMNH99019	C. albimarginatus
FMNH99020	C. albimarginatus
FMNH99021	C. albimarginatus
FMNH99023	C. obscurus
FMNH99024	C. obscurus
FMNH99025	C. falciformis
FMNH99026	C. falciformis
FMNH99027	C. falciformis
FMNH99028	C. albimarginatus
FMNH99029	C. longimanus
FMNH99030	C. longimanus
FMNH99031	C. falciformis
FMNH99032	C. albimarginatus
FMNH99033	C. albimarginatus
FMNH99034	C. obscurus
FMNH99035	C. longimanus
FMNH99036	C. falciformis
FMNH99037	C. obscurus
FMNH99038	C. falciformis
FMNH99039	C. obscurus
FMNH99040	C. longimanus
FMNH99041	C. albimarginatus
FMNH99042	C. sorrah	S. zygaena
FMNH99043	C. albimarginatus
FMNH99044	C. falciformis	C. albimarginatus
FMNH99045	C. obscurus
FMNH99046	C. longimanus	C. sorrah
FMNH99047	C. longimanus	C. albimarginatus
FMNH99049	C. obscurus
FMNH99050	C. obscurus
FMNH99051	C. obscurus
FMNH99052	C. falciformis
FMNH99054	C. falciformis
FMNH99055	C. obscurus
FMNH99056	C. sorrah
FMNH99057	C. albimarginatus
FMNH99058	C. albimarginatus
FMNH99060	C. longimanus
FMNH99061	C. albimarginatus
FMNH99062	C. longimanus
FMNH99063	C. albimarginatus
FMNH99064	C. obscurus	C. longimanus
FMNH99065	C. obscurus
FMNH99066	C. albimarginatus
FMNH99067	C. falciformis
FMNH99068	C. obscurus
FMNH99069	C. falciformis
FMNH99070	Prionace glauca	C. albimarginatus
FMNH99071	C. longimanus
FMNH99072	C. falciformis
FMNH99073	C. obscurus
FMNH99074	C. obscurus
FMNH99075	P. glauca
FMNH99076	C. falciformis
