# Supplementary material for: Shark Tooth Weapons from the 19th Century Reflect Shifting Baselines in Central Pacific Predator Assemblies
Source: PLoS One. 2013 Apr 3;8(4):e59855. doi: 10.1371/journal.pone.0059855 (PMC3616018; doi:10.1371/journal.pone.0059855)
Supplement: Table S2 — A list of shark jaws in the FMNH and AMNH collections used to evaluate the weapons from Table S1. (XLSX) [file pone.0059855.s002.xlsx]

## Sheet: S2
Catalogue Number	Primary Species
AMNH 89002	Carcharhinus albimarginatus
AMNH 89051	C. falciformis
AMNH 89192	C. falciformis
AMNH 89264	C. galapagensis
AMNH 22412	C. leucas
AMNH 89257	C. longimanus
AMNH 89231	C. longimanus
AMNH 89170	C. obscurus
AMNH 79977	C. sorrah
AMNH 89017	C. sorrah
AMNH 89013	C. sorrah
AMNH 89014	C. sorrah
FMNH 48365	C. longimanus
FMNH 33945	C. obscurus
FMNH 51200	C. falciformis*
FMNH 100569	Galeocerado cuvier
* listed as C. floridensis
